# Supplementary material
Source: PubMed Central journal article supplement (PMC4042770)
Supplement: JCM.00702-14_zjm999093423so1.pdf [file JCM.00702-14_zjm999093423so1.pdf]

Table S1. Group1. Comparison between pp65 antigen levels in 30 positive BM and/or PBL samples pairs obtained from 24 HSCT recipients

| Patient Number# | Time from HSCT to BM biopsy, days§ | BM cells Pp65 antigen | PBL Pp65 antigen |
|-----------------|------------------------------------|-----------------------|------------------|
| 1               | +42                                | 5                     | 12               |
| 2               | +70                                | 1                     | 7                |
| 3               | +69                                | 24                    | 14               |
| 4               | +37                                | 11                    | 2                |
| 5               | +57                                | 60                    | 350              |
| 6               | +108                               | 1                     | 4                |
| 7*              | +160                               | 16                    | 8                |
| 7*              | +198                               | 3                     | 0                |
| 7*              | +253                               | 1                     | 20               |
| 8               | +62                                | 32                    | 170              |
| 9               | +121                               | 1                     | 2                |
| 10              | +42                                | 5                     | 11               |
| 11*             | +30                                | 18                    | 235              |
| 11*             | +70                                | 2                     | 1                |
| 11*             | +110                               | 1                     | 76               |
| 12              | +120                               | 11                    | 26               |
| 13*             | +70                                | 2                     | 5                |
| 13*             | +641                               | 2                     | 5                |
| 14              | +55                                | 0                     | 236              |
| 15              | +28                                | 0                     | 1                |
| 16              | +59                                | 0                     | 7                |
| 17              | +52                                | 0                     | 1                |
| 18              | +204                               | 0                     | 1                |
| 19              | +82                                | 320                   | 0                |
| 20              | +400                               | 26                    | 0                |
| 21*             | +61                                | 2                     | 0                |
| 21*             | +121                               | 6                     | 0                |
| 22              | +44                                | 4                     | 0                |
| 23              | +84                                | 6                     | 0                |
| 24              | +100                               | 1                     | 0                |

\*For patients 7, 11,13, and 21 were analyzed 3,3,2, and 2 BM samples, respectively.

§ Overall PBL and BM samples were obtained at a median of 70 days after HSCT (range 28-641 days). CMV positive BM samples were obtained at a median of 82 days after HSCT (range 30-641 days).

#Patients 1-24: preemptive therapy with ganciclovir or foscarnet was initiated at the first detection of CMV, in the PBL and/or BM samples.
