# Supplementary material
Source: PubMed Central journal article supplement (PMC4042770)
Supplement: JCM.00702-14_zjm999093423so2.pdf [file JCM.00702-14_zjm999093423so2.pdf]

**Table S2. Clinical characteristics of patients pp65-Ag (Group I) and CMV DNA (Group II) positive in PBL and/or BM samples**

|                                    | <b>Group I: patients positive for pp65-AG</b> | <b>Group II: patients positive for CMV DNA</b> |
|------------------------------------|-----------------------------------------------|------------------------------------------------|
| <b>N. patients</b>                 | <b>24</b>                                     | <b>14</b>                                      |
| <b>Age (years), median (range)</b> | <b>40 (range 5-55)</b>                        | <b>32 (range 6-59)</b>                         |
| <b>Sex</b>                         | <b>12M/12F</b>                                | <b>7M/7F</b>                                   |
| <b>Underlying diseases</b>         |                                               |                                                |
| <b>Acute Myeloid Leukemia</b>      | <b>6</b>                                      | <b>3</b>                                       |
| <b>Chronic Myeloid Leukemia</b>    | <b>4</b>                                      | <b>3</b>                                       |
| <b>Acute Lymphoid Leukemia</b>     | <b>6</b>                                      | <b>3</b>                                       |
| <b>Multiple Myeloma</b>            | <b>6</b>                                      | <b>1</b>                                       |
| <b>Other</b>                       | <b>2</b>                                      | <b>4</b>                                       |
| <b>Type of HSCT</b>                |                                               |                                                |
| <b>Related Donor</b>               | <b>15</b>                                     | <b>8</b>                                       |
| <b>Mismatched Unrelated Donor</b>  | <b>4</b>                                      | <b>5</b>                                       |
| <b>Cord Blood</b>                  | <b>5</b>                                      | <b>1</b>                                       |
| <b>Acute GVHD</b>                  | <b>14</b>                                     | <b>5</b>                                       |
| <b>Chronic GVHD</b>                | <b>4</b>                                      | <b>0</b>                                       |
| <b>CMV disease</b>                 | <b>0</b>                                      | <b>0</b>                                       |
| <b>Death</b>                       | <b>11</b>                                     | <b>3</b>                                       |
